# Supplementary material for: Effect of Petiveria alliacea Extracts on Metabolism of K562 Myeloid Leukemia Cells
Source: MDPI journal article supplement (doi:10.3390/ijms242417418), 2023-12-13
Supplement: s1 [file s1]

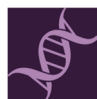

**Table S1.** List of all metabolites identified in the K562 cell lysates treated with Esperanza.

1

| Compound                         | Formula                                           | Mass     | Rt (min) | Error (ppm) | Adduct              | <sup>a</sup> CV for QC (%) | Analytical platform | DET  | <sup>b</sup> ID Level | <sup>c</sup> Fold Change | <sup>d</sup> p value | <sup>e</sup> VIP |
|----------------------------------|---------------------------------------------------|----------|----------|-------------|---------------------|----------------------------|---------------------|------|-----------------------|--------------------------|----------------------|------------------|
| <b>Fatty acyls</b>               |                                                   |          |          |             |                     |                            |                     |      |                       |                          |                      |                  |
| Hydroxyoctadecatrienoylcarnitine | C <sub>25</sub> H <sub>43</sub> NO <sub>5</sub>   | 438,3218 | 21.31    | 1           | [M+H] <sup>+</sup>  | 19.55                      | GM-LC/MS            | ESI+ | 3                     | ↑                        | 0.010†               | -                |
| Hydroxyoctenoylcarnitine         | C <sub>15</sub> H <sub>27</sub> NO <sub>5</sub>   | 302,1966 | 1.62     | 1           | [M+H] <sup>+</sup>  | 6.01                       | GM-LC/MS            | ESI+ | 3                     | 1.75                     | 0.009†               | -                |
| Acetylcarnitine                  | C <sub>9</sub> H <sub>17</sub> NO <sub>4</sub>    | 204,1233 | 1.59     | 1           | [M+H] <sup>+</sup>  | 4.23                       | GM-LC/MS            | ESI+ | 3                     | 1.29                     | -                    | 1.40             |
| Propionylcarnitine               | C <sub>10</sub> H <sub>19</sub> NO <sub>4</sub>   | 218,139  | 2.90     | 1           | [M+H] <sup>+</sup>  | 5.11                       | GM-LC/MS            | ESI+ | 3                     | 0.59                     | 0.01†                | -                |
| Methylglutaric acid              | C <sub>6</sub> H <sub>10</sub> O <sub>4</sub>     | 147,0657 | 21.95    | 4           | [M+H] <sup>+</sup>  | 3.30                       | GM-LC/MS            | ESI+ | 3                     | 1.25                     | -                    | 1.33             |
| <b>Glycerophospholipids</b>      |                                                   |          |          |             |                     |                            |                     |      |                       |                          |                      |                  |
| PE 20:4                          | C <sub>25</sub> H <sub>44</sub> NO <sub>7</sub> P | 502.2931 | 22.86    | 1           | [M+H] <sup>+</sup>  | 11.27                      | GM-LC/MS            | ESI+ | 3                     | 6.64                     | 0.009†               | 2.16             |
| PC 18:3                          | C <sub>26</sub> H <sub>48</sub> NO <sub>7</sub> P | 518.325  | 21.90    | 2           | [M+H] <sup>+</sup>  | 9.67                       | GM-LC/MS            | ESI+ | 3                     | ↑                        | 0.01†                |                  |
| PC 18:3                          | C <sub>26</sub> H <sub>48</sub> NO <sub>7</sub> P | 518.325  | 22.13    | 2           | [M+H] <sup>+</sup>  | 9.50                       | GM-LC/MS            | ESI+ | 3                     | 3.37                     | 0.009†               |                  |
| PI 24:0                          | C <sub>33</sub> H <sub>63</sub> O <sub>13</sub> P | 699.4056 | 16.42    | 3           | [M+H] <sup>+</sup>  | 9.77                       | GM-LC/MS            | ESI+ | 3                     | 1.43                     | 0.009†               |                  |
| PG O-39:0                        | C <sub>45</sub> H <sub>91</sub> O <sub>9</sub> P  | 829.6306 | 21.95    | 2           | [M+Na] <sup>+</sup> | 12.65                      | GM-LC/MS            | ESI+ | 4                     | 1.97                     | -                    | 1.79             |
| PS 2-OMe,14Me-15:0               | C <sub>23</sub> H <sub>48</sub> NO <sub>9</sub> P | 514.3168 | 21.95    | 6           | [M+H] <sup>+</sup>  | 4.64                       | GM-LC/MS            | ESI+ | 3                     | 1.17                     | -                    | 1.79             |
| <b>Indoles and derivatives</b>   |                                                   |          |          |             |                     |                            |                     |      |                       |                          |                      |                  |
| Indoleacrylic acid               | C <sub>11</sub> H <sub>9</sub> NO <sub>2</sub>    | 188.0708 | 8.91     | 1           | [M+H] <sup>+</sup>  | 7.93                       | GM-LC/MS            | ESI+ | 3                     | 1.36                     | -                    | 1.34             |
| Tryptophanol                     | C <sub>10</sub> H <sub>11</sub> NO                | 184.0737 | 1.51     | 3           | [M+Na] <sup>+</sup> | 4.67                       | GM-LC/MS            | ESI+ | 3                     | 0.61                     | 0.009†               | -                |
| <b>Organooxygen compounds</b>    |                                                   |          |          |             |                     |                            |                     |      |                       |                          |                      |                  |
| Sorbose                          | C <sub>6</sub> H <sub>12</sub> O <sub>6</sub>     | 180.0634 | 17.48    | -           | -                   | 7.94                       | GC-QTOF-MS          | -    | 2                     | 1.70                     | 0.038†               | -                |
| Phosphogluconic acid             | C <sub>6</sub> H <sub>13</sub> O <sub>10</sub> P  | 276.0246 | 22.20    | -           | -                   | 5.74                       | GC-QTOF-MS          | -    | 2                     | 4.68                     | 0.019†               | -                |
| Glucose                          | C <sub>6</sub> H <sub>12</sub> O <sub>6</sub>     | 180.0634 | 17.80    | -           | -                   | 4.16                       | GC-QTOF-MS          | -    | 2                     | 1.65                     | -                    | 2.01             |
| Mannitol                         | C <sub>6</sub> H <sub>14</sub> O <sub>6</sub>     | 182.0790 | 17.78    | -           | -                   | 3.98                       | GC-QTOF-MS          | -    | 2                     | 1.69                     | -                    | 1.35             |
| Gluconic acid                    | C <sub>6</sub> H <sub>12</sub> O <sub>7</sub>     | 196.0583 | 18.41    | -           | -                   | 4.49                       | GC-QTOF-MS          | -    | 2                     | 0.75                     | 0.009†               | -                |
| Myo-inositol                     | C <sub>6</sub> H <sub>12</sub> O <sub>6</sub>     | 180.0634 | 19.57    | -           | -                   | 3.67                       | GC-QTOF-MS          | -    | 2                     | 0.94                     | 0.009†               | 3.55             |
| Pantothenate                     | C <sub>9</sub> H <sub>17</sub> NO <sub>5</sub>    | 220.1183 | 4.90     | 2           | [M+H] <sup>+</sup>  | 14.08                      | GM-LC/MS            | ESI+ | 3                     | 0.99                     | -                    | 1.31             |

| Carboxylic acids and derivatives      |                                                                               |          |       |   |                     |       |            |      |   |      |        |      |
|---------------------------------------|-------------------------------------------------------------------------------|----------|-------|---|---------------------|-------|------------|------|---|------|--------|------|
| Serine                                | C <sub>3</sub> H <sub>7</sub> NO <sub>3</sub>                                 | 105.0426 | 9.79  | - | -                   | 3.26  | GC-QTOF-MS | -    | 2 | 2.07 | 0.009† | 3.74 |
| Proline                               | C <sub>5</sub> H <sub>9</sub> NO <sub>2</sub>                                 | 115.0633 | 9.49  | - | -                   | 5.81  | GC-QTOF-MS | -    | 2 | 1.03 | -      | 1.65 |
| Alanine                               | C <sub>3</sub> H <sub>7</sub> NO <sub>2</sub>                                 | 89.0477  | 7.54  | - | -                   | 2.94  | GC-QTOF-MS | -    | 2 | 0.86 | -      | 4.36 |
| Glycine                               | C <sub>2</sub> H <sub>5</sub> NO <sub>2</sub>                                 | 75.0320  | 9.15  | - | -                   | 3.20  | GC-QTOF-MS | -    | 2 | 1.03 | -      | 1.89 |
| Methionine                            | C <sub>5</sub> H <sub>11</sub> NO <sub>2</sub> S                              | 149.0510 | 13.28 | - | -                   | 6.38  | GC-QTOF-MS | -    | 2 | 1.27 | 0.038† | -    |
| Glutamine                             | C <sub>5</sub> H <sub>10</sub> N <sub>2</sub> O <sub>3</sub>                  | 146.0691 | 16.20 | - | -                   | 4.17  | GC-QTOF-MS | -    | 2 | 0.79 | -      | 3.56 |
| Tyrosine                              | C <sub>9</sub> H <sub>11</sub> NO <sub>3</sub>                                | 181.0739 | 17.65 | - | -                   | 6.55  | GC-QTOF-MS | -    | 2 | 0.92 | -      | 1.06 |
| LactoylLeucine                        | C <sub>9</sub> H <sub>17</sub> NO <sub>4</sub>                                | 204.1233 | 1.59  | 1 | [M+H] <sup>+</sup>  | 4.23  | GM-LC/MS   | ESI+ | 3 | 1.29 | -      | 1.40 |
| Leucine                               | C <sub>6</sub> H <sub>13</sub> NO <sub>2</sub>                                | 131.0946 | 10.02 | - | -                   | 7.65  | GC-QTOF-MS | -    | 2 | 0.96 | -      | 1.21 |
| Norleucine                            | C <sub>6</sub> H <sub>13</sub> NO <sub>2</sub>                                | 131.0946 | 10.32 | - | -                   | 7.49  | GC-QTOF-MS | -    | 2 | 0.92 | -      | 1.17 |
| Fumaric acid                          | C <sub>4</sub> H <sub>4</sub> O <sub>4</sub>                                  | 116.011  | 10.98 | - | -                   | 6.71  | GC-QTOF-MS | -    | 2 | 0.54 | 0.009† | 1.51 |
| Glutaric acid                         | C <sub>5</sub> H <sub>8</sub> O <sub>4</sub>                                  | 132.0423 | 13.95 | - | -                   | 6.29  | GC-QTOF-MS | -    | 2 | 0.60 | 0.009† | -    |
| Oxalic acid                           | C <sub>2</sub> H <sub>2</sub> O <sub>4</sub>                                  | 89.9953  | 7.97  | - | -                   | 6.52  | GC-QTOF-MS | -    | 2 | 1.29 | 0.009† | 1.20 |
| Glutamic acid                         | C <sub>5</sub> H <sub>9</sub> NO <sub>4</sub>                                 | 147.0532 | 13.72 | - | -                   | 5.06  | GC-QTOF-MS | -    | 2 | 0.87 | 0.009† | 4.96 |
| Glutathione                           | C <sub>10</sub> H <sub>17</sub> N <sub>3</sub> O <sub>6</sub> S               | 308.0915 | 2.12  | 1 | [M+H] <sup>+</sup>  | 5.72  | GM-LC/MS   | ESI+ | 2 | 1.31 | 0.019† | 3.55 |
| Dicarboxyethyl Glutathione            | C <sub>14</sub> H <sub>21</sub> N <sub>3</sub> O <sub>10</sub> S              | 424.1022 | 2.12  | 0 | [M+H] <sup>+</sup>  | 19.81 | GM-LC/MS   | ESI+ | 3 | 0.53 | 0.019† | -    |
| Pyroglutamic acid                     | C <sub>5</sub> H <sub>7</sub> NO <sub>3</sub>                                 | 129.0426 | 13.32 | - | -                   | 2.69  | GC-QTOF-MS | -    | 2 | 0.95 | 0.038† | 1.90 |
| Methyl pyruvic acid                   | C <sub>4</sub> H <sub>6</sub> O <sub>3</sub>                                  | 103.0395 | 1.54  | 5 | [M+H] <sup>+</sup>  | 6.71  | GM-LC/MS   | ESI+ | 2 | 0.61 | 0.009† | -    |
| Malic acid                            | C <sub>4</sub> H <sub>6</sub> O <sub>5</sub>                                  | 134.0215 | 12.91 | - | -                   | 4.47  | GC-QTOF-MS | -    | 2 | 0.57 | 0.019† | 1.62 |
| Nucleosides, nucleotides, and analogs |                                                                               |          |       |   |                     |       |            |      |   |      |        |      |
| Guanosine monophosphate               | C <sub>10</sub> H <sub>14</sub> N <sub>5</sub> O <sub>8</sub> P               | 386.0444 | 1.58  | 8 | [M+Na] <sup>+</sup> | 7.65  | GM-LC/MS   | ESI+ | 4 | 0.60 | 0.009† | -    |
| NADH                                  | C <sub>21</sub> H <sub>29</sub> N <sub>7</sub> O <sub>14</sub> P <sub>2</sub> | 666.1314 | 1.59  | 1 | [M+H] <sup>+</sup>  | 7.91  | GM-LC/MS   | ESI+ | 3 | 0.59 | 0.009† | -    |
| Thioinosine monophosphate             | C <sub>10</sub> H <sub>13</sub> N <sub>4</sub> O <sub>7</sub> PS              | 387.0106 | 1.59  | 8 | [M+Na] <sup>+</sup> | 15.80 | GM-LC/MS   | ESI+ | 4 | 0.33 | 0.009† | -    |
| Methylthioadenosine                   | C <sub>11</sub> H <sub>15</sub> N <sub>5</sub> O <sub>3</sub> S               | 297.0896 | 25.10 | - | -                   | 7.81  | GC-QTOF-MS | -    | 2 | 0.73 | 0.009† | -    |
| Inosinic acid                         | C <sub>10</sub> H <sub>13</sub> N <sub>4</sub> O <sub>8</sub> P               | 348.0471 | 26.55 | - | -                   | 26.19 | GC-QTOF-MS | -    | 2 | 0.41 | 0.009† | -    |
| Adenosine monophosphate               | C <sub>10</sub> H <sub>14</sub> N <sub>5</sub> O <sub>7</sub> P               | 370.0522 | 1.57  | 0 | [M+Na] <sup>+</sup> | 4.02  | GM-LC/MS   | ESI+ | 2 | 0.44 | 0.009† | 1.05 |
| Organonitrogen compounds              |                                                                               |          |       |   |                     |       |            |      |   |      |        |      |

|                           |                                                             |          |       |   |                                     |       |            |      |   |      |        |      |
|---------------------------|-------------------------------------------------------------|----------|-------|---|-------------------------------------|-------|------------|------|---|------|--------|------|
| Sphingosine               | C <sub>15</sub> H <sub>31</sub> NO <sub>2</sub>             | 240.2326 | 20.56 | 1 | [M+H-H <sub>2</sub> O] <sup>+</sup> | 14.22 | GM-LC/MS   | ESI+ | 3 | 1.80 | 0.019† | 1.31 |
| <b>Diazines</b>           |                                                             |          |       |   |                                     |       |            |      |   |      |        |      |
| Uracil                    | C <sub>4</sub> H <sub>4</sub> N <sub>2</sub> O <sub>2</sub> | 112.0273 | 10.94 | - | -                                   | 11.59 | GC-QTOF-MS | -    | 2 | 0.83 | 0.038† | -    |
| <b>Imidazopyrimidines</b> |                                                             |          |       |   |                                     |       |            |      |   |      |        |      |
| Hypoxanthine              | C <sub>5</sub> H <sub>4</sub> N <sub>4</sub> O              | 136.0385 | 16.54 | - | -                                   | 7.93  | GC-QTOF-MS | -    | 2 | 0.45 | 0.009† | -    |

\* Rt: retention time; <sup>a</sup>CV: coefficient of variation in the metabolites in the QC samples; <sup>b</sup>Identification level: level 1 structure confirmed, level 2 structure probable, level 3 unequivocal molecular formula (s), level 4 exact mass; <sup>c</sup>Change: change in the abundance of the specified comparison calculated as (case/control); <sup>d</sup>*p value* †: corresponding to the *p values* calculated by the Benjamini-Hochberg false discovery rate post hoc correction (FDR < 0.05); <sup>e</sup>VIP: variable importance in projection; GM: global metabolomics; LC: liquid chromatography; GC: gas chromatography; QTOF-MS: quadrupole time-of-flight mass spectrometer; PC: phosphatidylcholines; PE: phosphatidylethanolamine; PG: phosphatidylglycerol; PI: phosphatidylinositol; PS: phosphatidylserine. ▲: metabolites present only in Esperanza-treated cell lysates.

2  
3  
4  
5  
6  
7  
8  
9  
10  
11  
12  
13  
14  
15  
16  
17  
18  
19  
20  
21  
22  
23  
24  
25  
26

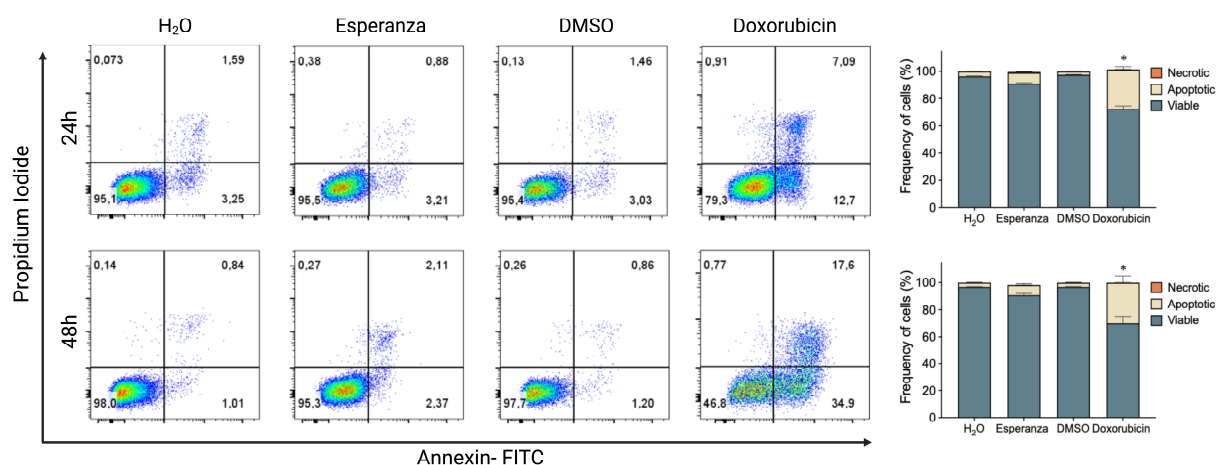

**Figure S1.** Cell death induction and frequency of live cells (Annexin V-, PI-), apoptotic cells (An-nexin V+, PI-; Annexin V+, PI+), and necrotic cells (Annexin V+, PI+) in K562 cells. The data from three independent experiments are presented. Significant differences were observed in the percentage of apoptotic cells after the treatment with doxorubicin compared to the rest of the treatments (yellow bars). \*  $p < 0.05$

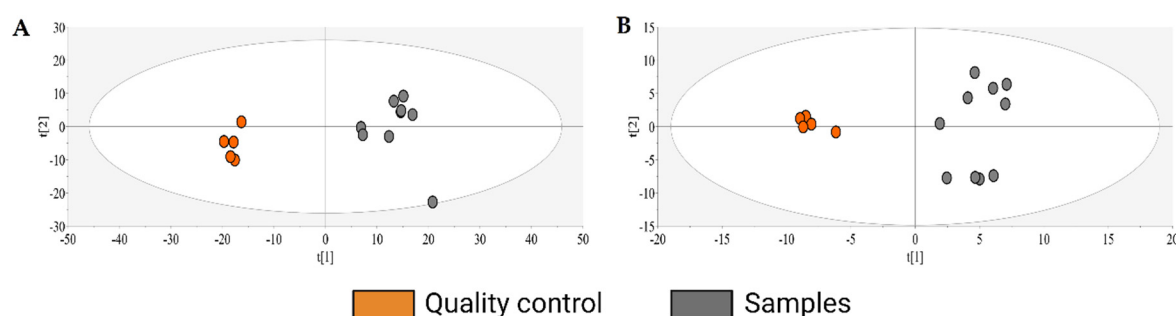

**Figure S2.** PCA score plots. PCA score plots for data set filtered by presence and reproducibility. A. LC-QTOF-MS,  $R^2$ : 0.825,  $Q^2$ : 0.678. B. GC-QTOF-MS,  $R^2$ : 0.54,  $Q^2$ : 0.199. Dots in orange color denote quality control and gray dots correspond to samples (cell lysates treated and untreated).

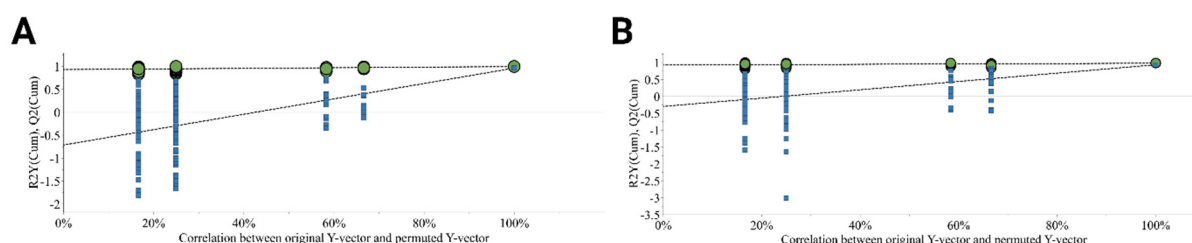

**Figure S3.** Permutation test. A. LC-QTOF-MS. B. GC-QTOF-MS.

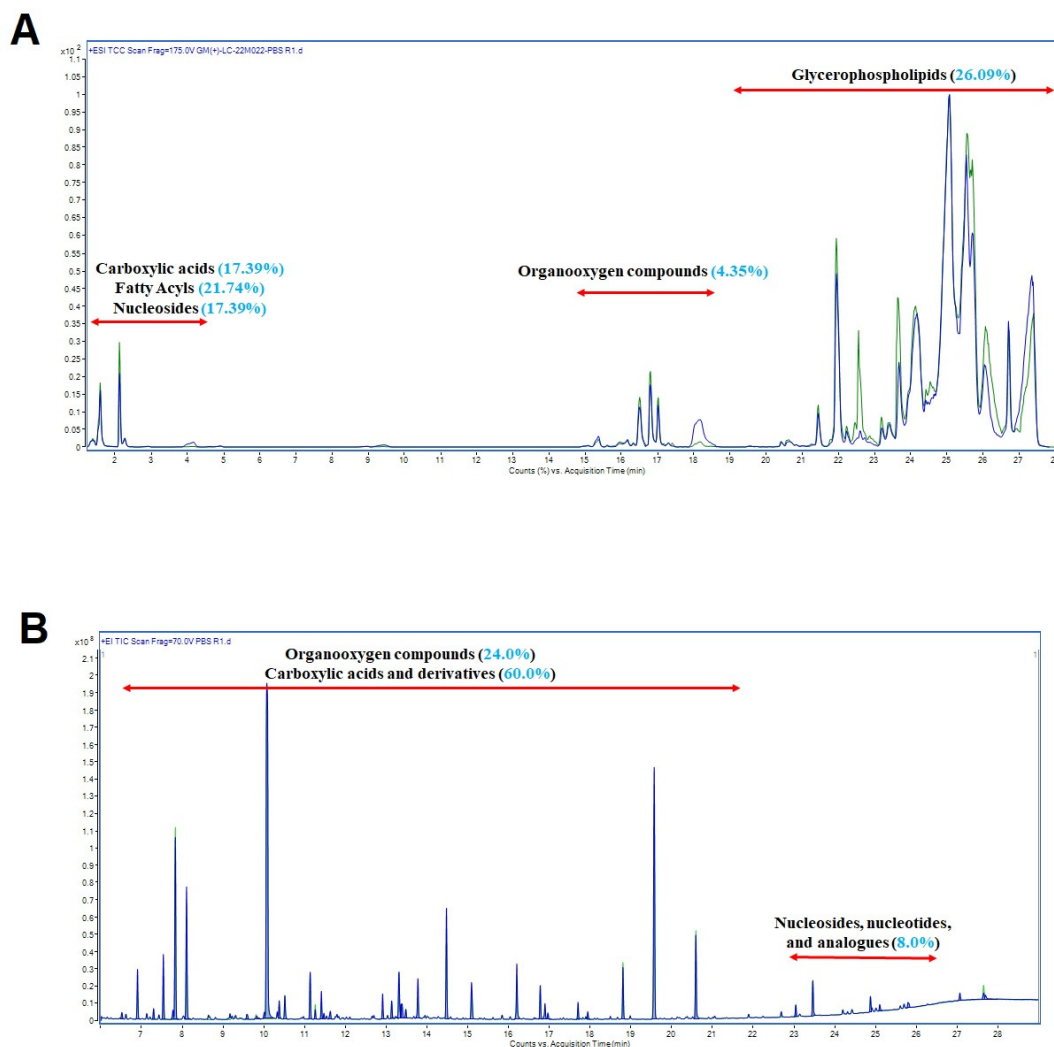

**Figure S4.** Comparison of LC-QTOF-MS and LC-QTOF-MS base peak chromatograms. **A.** LC-QTOF-MS for cell lysates treated with PBS (blue) and cell lysates treated with Esperanza extract (green). **B.** GC-QTOF-MS for cell lysates treated with PBS (blue) and cell lysates treated with Esperanza extract (green).
